# Supplementary material for: Effect of Si, Be, Al, N and S dual doping on arsenene: first-principles insights
Source: Royal Society of Chemistry journal article supplement (doi:10.1039/d1ra03394h), 2021-01-01
Supplement: d1ra03394h1.pdf [file d1ra03394h1.pdf]

### Supplementary Information (SI)

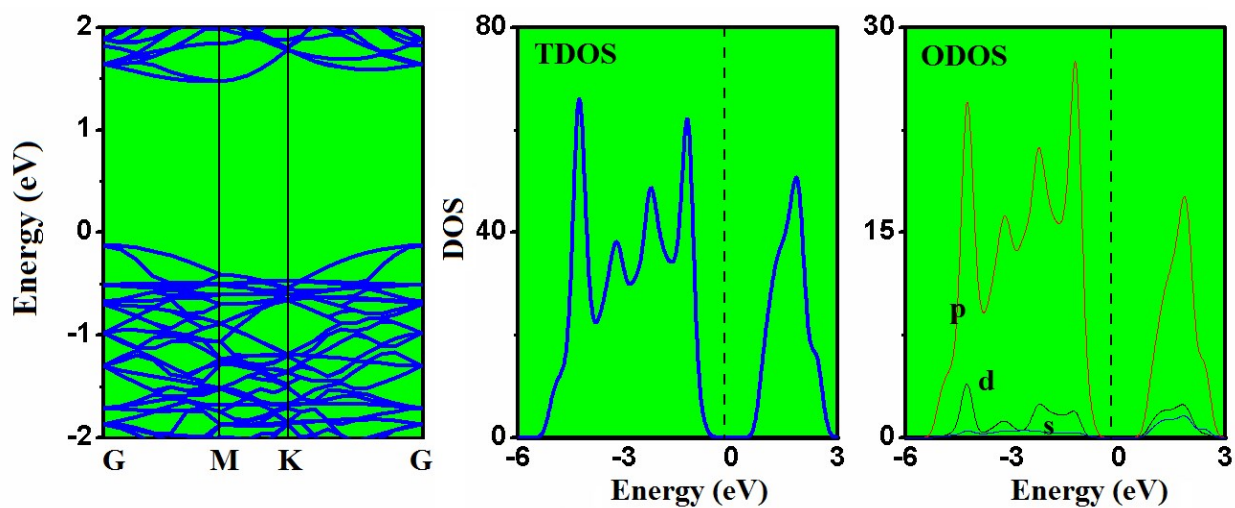

Figure S1: Computed GGA/PBE based electronic band structure and density of states for 5x5 supercell pristine arsenene

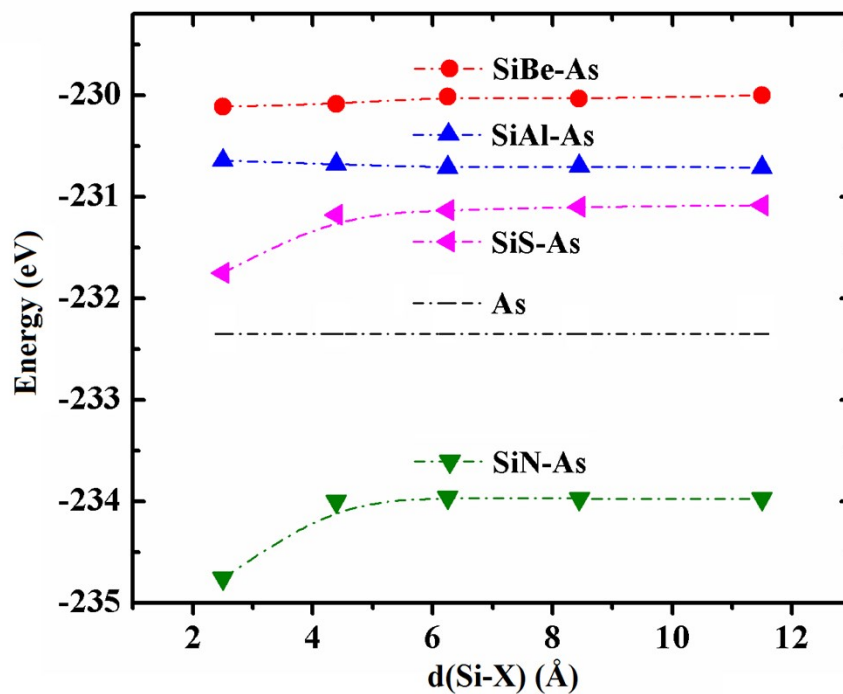

Figure S2: Total energy comparison in various doping systems

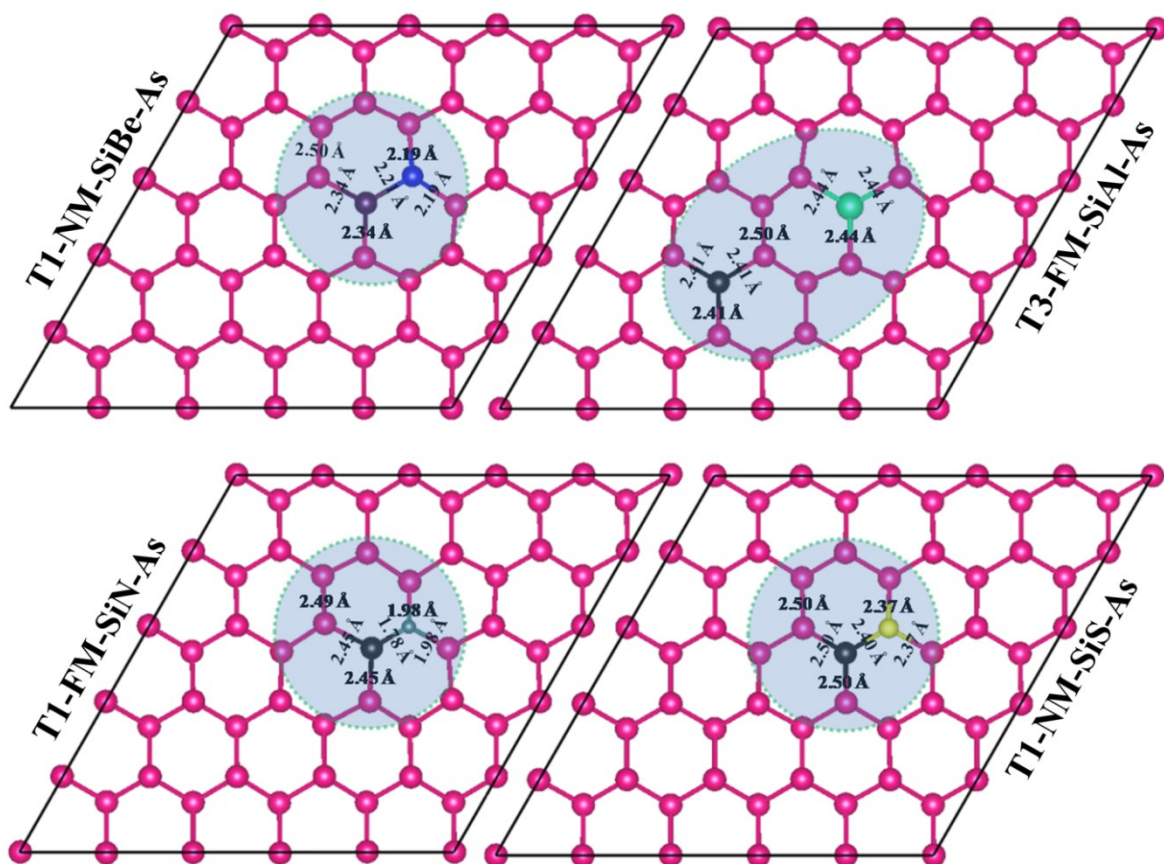

Figure S3: Bond lengths around the doped sites

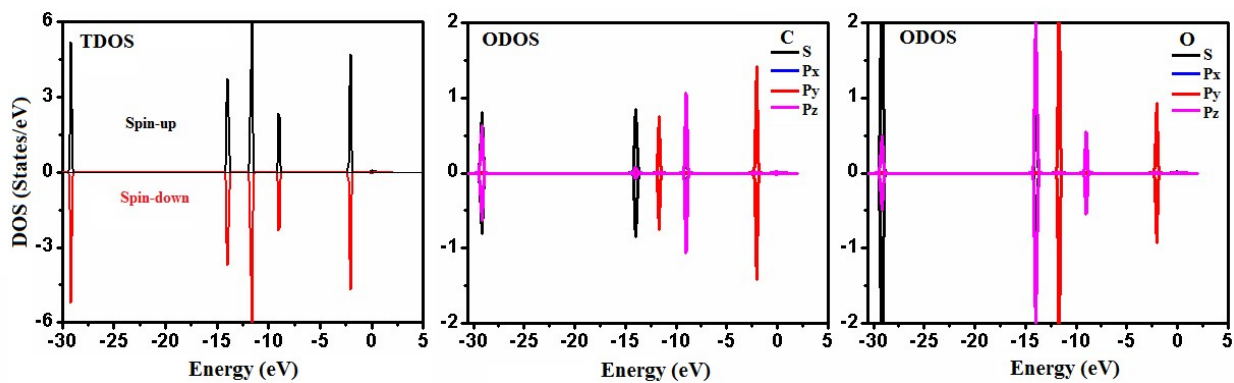

Figure S4: Spin-polarized total and orbital resolved density of states for isolated CO molecule
